# Supplementary material for: Utilizing red mud from industrial waste as catalysts for the hydrogenation of CO2 into value added chemicals
Source: Royal Society of Chemistry journal article supplement (doi:10.1039/d4ra08784d), 2025-01-01
Supplement: d4ra08784d1.pdf [file d4ra08784d1.pdf]

## *Supporting Information*

# **Utilizing Red Mud from Industrial Waste as Catalysts for the Hydrogenation of CO<sub>2</sub> into Value Added Chemicals**

Mahbuba Aktary,<sup>a</sup> Mohammed A. Sanhoob,<sup>b</sup> Atif S. Alzharani,<sup>\* a, c</sup>

Huda S. Alghamdi,<sup>b</sup> Afnan M. Ajeebi,<sup>b</sup> Md. Abdul Aziz,<sup>b</sup> M. Nasiruzzaman Shaikh<sup>b,\*</sup>

<sup>a</sup> *Materials Science and Engineering Department (MSE), King Fahd University of Petroleum and Minerals (KFUPM), Dhahran, Saudi Arabia*

<sup>b</sup> *Interdisciplinary Research Center for Hydrogen Technologies and Carbon Management (IRC-HTCM), King Fahd University of Petroleum & Minerals, Dhahran 31261, Saudi Arabia*

<sup>c</sup> *Interdisciplinary Research Center for Sustainable Energy Systems (IRC-SES), King Fahd University of Petroleum & Minerals, Dhahran 31261, Saudi Arabia*

| Contents                                                                                                          | Page# |
|-------------------------------------------------------------------------------------------------------------------|-------|
| EDS mapping of 3% metal-promoted Red Mud.                                                                         | 3     |
| Elemental mapping of 3% metal promoted Red Mud.                                                                   | 4     |
| XRF data for elemental composition of Red Mud (RM) and RM-based catalysts.                                        | 4     |
| HR-TEM of 3% metal promoted Red Mud.                                                                              | 5     |
| CO <sub>2</sub> conversion and hydrocarbon selectivity data of pure RM, 3%K@RM, and different wt% Fe-promoted RM. | 5     |

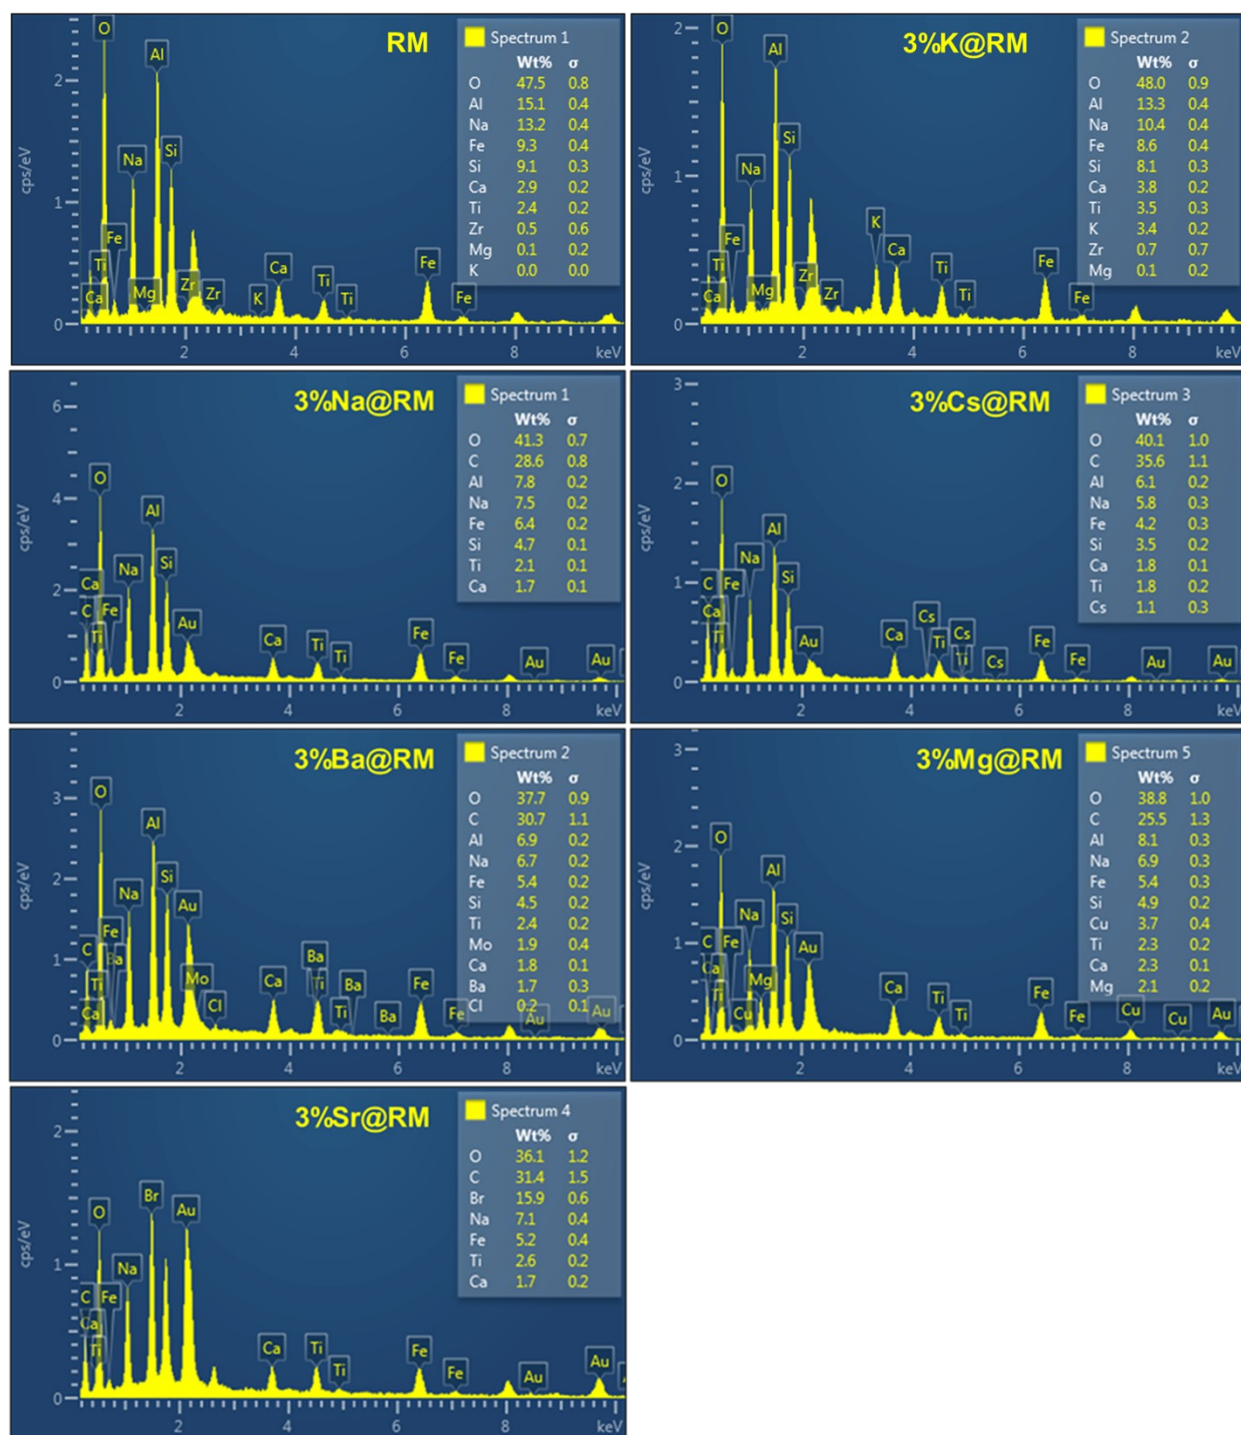

**Figure S1:** EDS mapping of 3% metal-promoted Red Mud.

**Table S1:** XRF data for elemental composition of Red Mud (RM) and RM-based catalysts.

| Element | RM    | 3%KOH@RM | HCl-RM |
|---------|-------|----------|--------|
| Na      | 19.83 | 17.68    | 0      |
| K       | 0.12  | 3.87     | 0.05   |
| Mg      | 0     | 0        | 0      |
| Ca      | 8.67  | 9.11     | 1.59   |
| Fe      | 28.79 | 30.54    | 44.79  |
| Al      | 20.4  | 19.25    | 10.3   |
| Ti      | 7.46  | 7.36     | 13.44  |
| Si      | 12.88 | 12.21    | 29.83  |

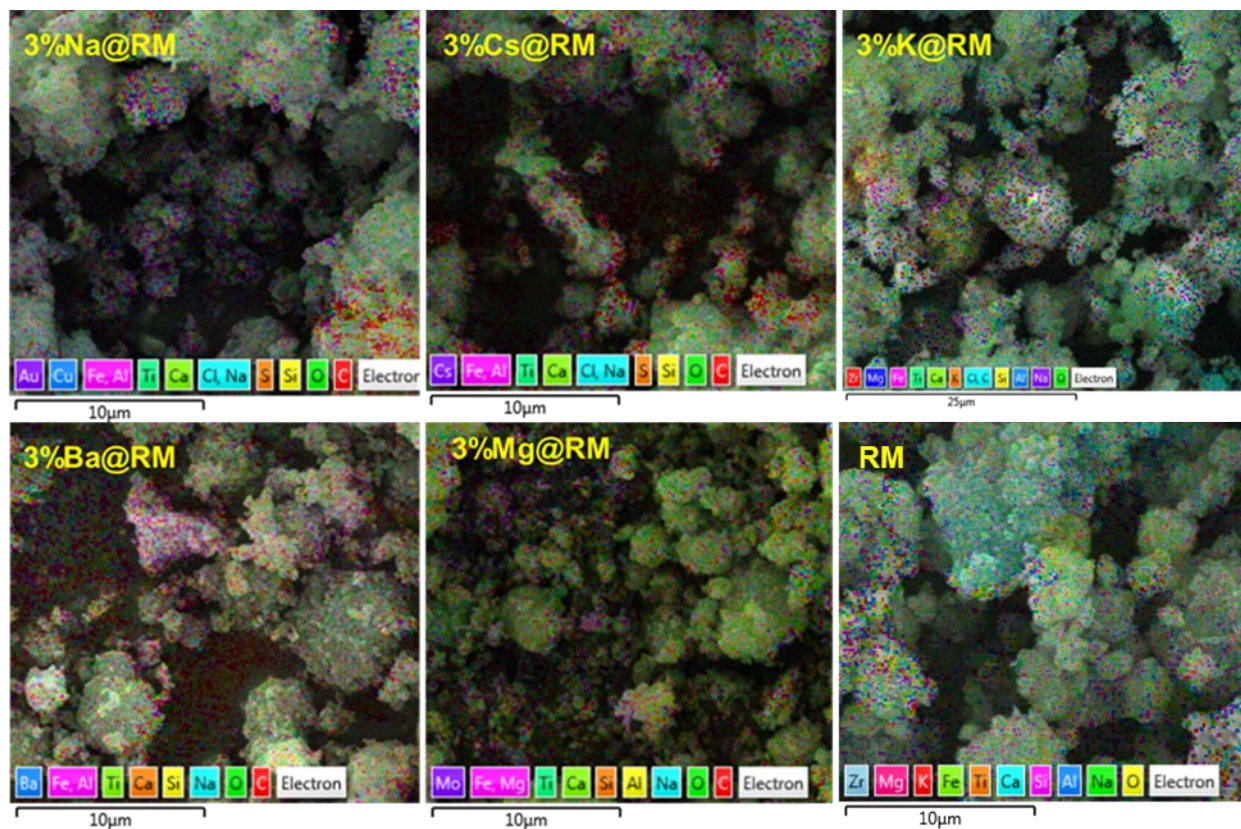

**Figure S2:** Elemental mapping of 3% metal-promoted Red Mud.



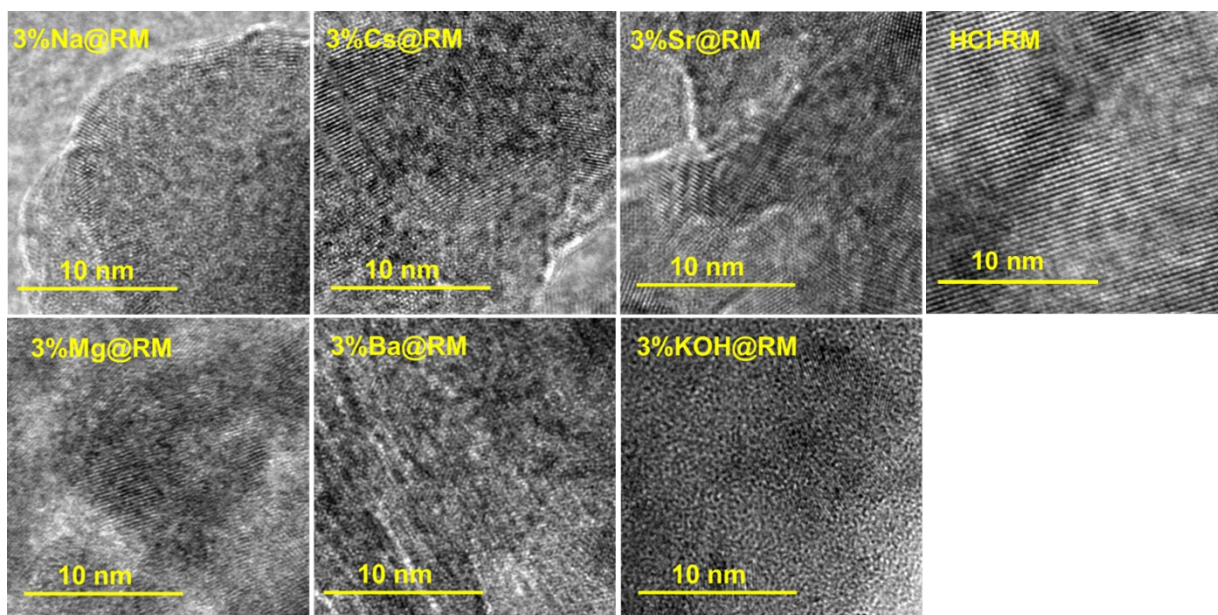

**Figure S3:** HR-TEM of 3% metal-promoted Red Mud.

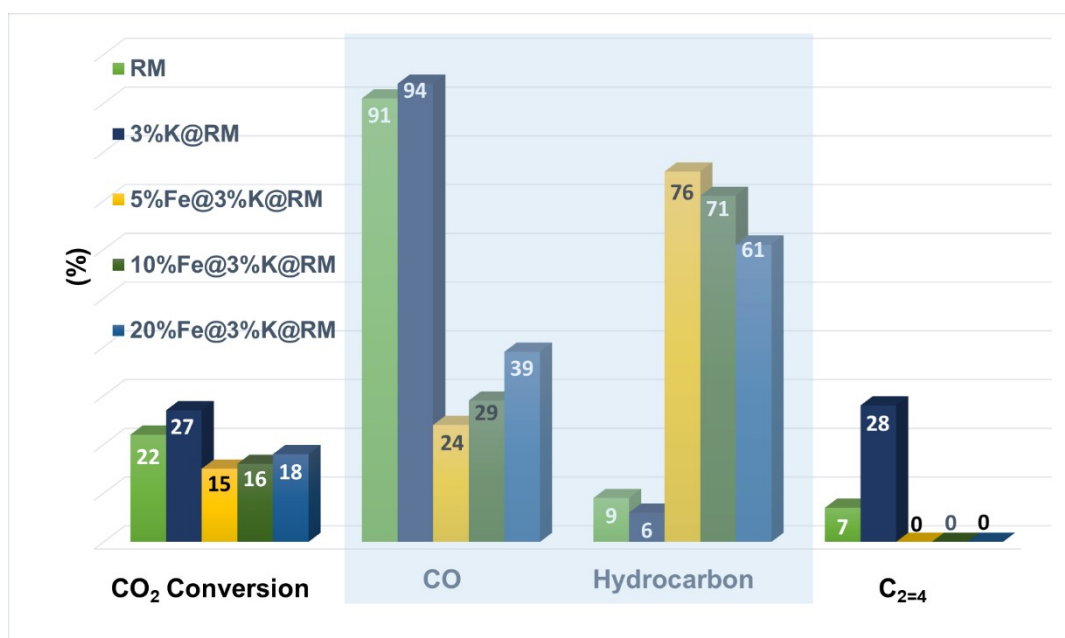

**Figure S4:** CO<sub>2</sub> conversion and hydrocarbon selectivity data of pure RM, 3%K@RM, and X(=5,10, 20) wt% Fe-promoted RM.
